# Supplementary material for: The Association of Perfluoroalkyl Substance Exposure and a Serum Liver Function Marker in Korean Adults
Source: MDPI journal article supplement (doi:10.3390/toxics11120965), 2023-11-28
Supplement: s1 [file s1]

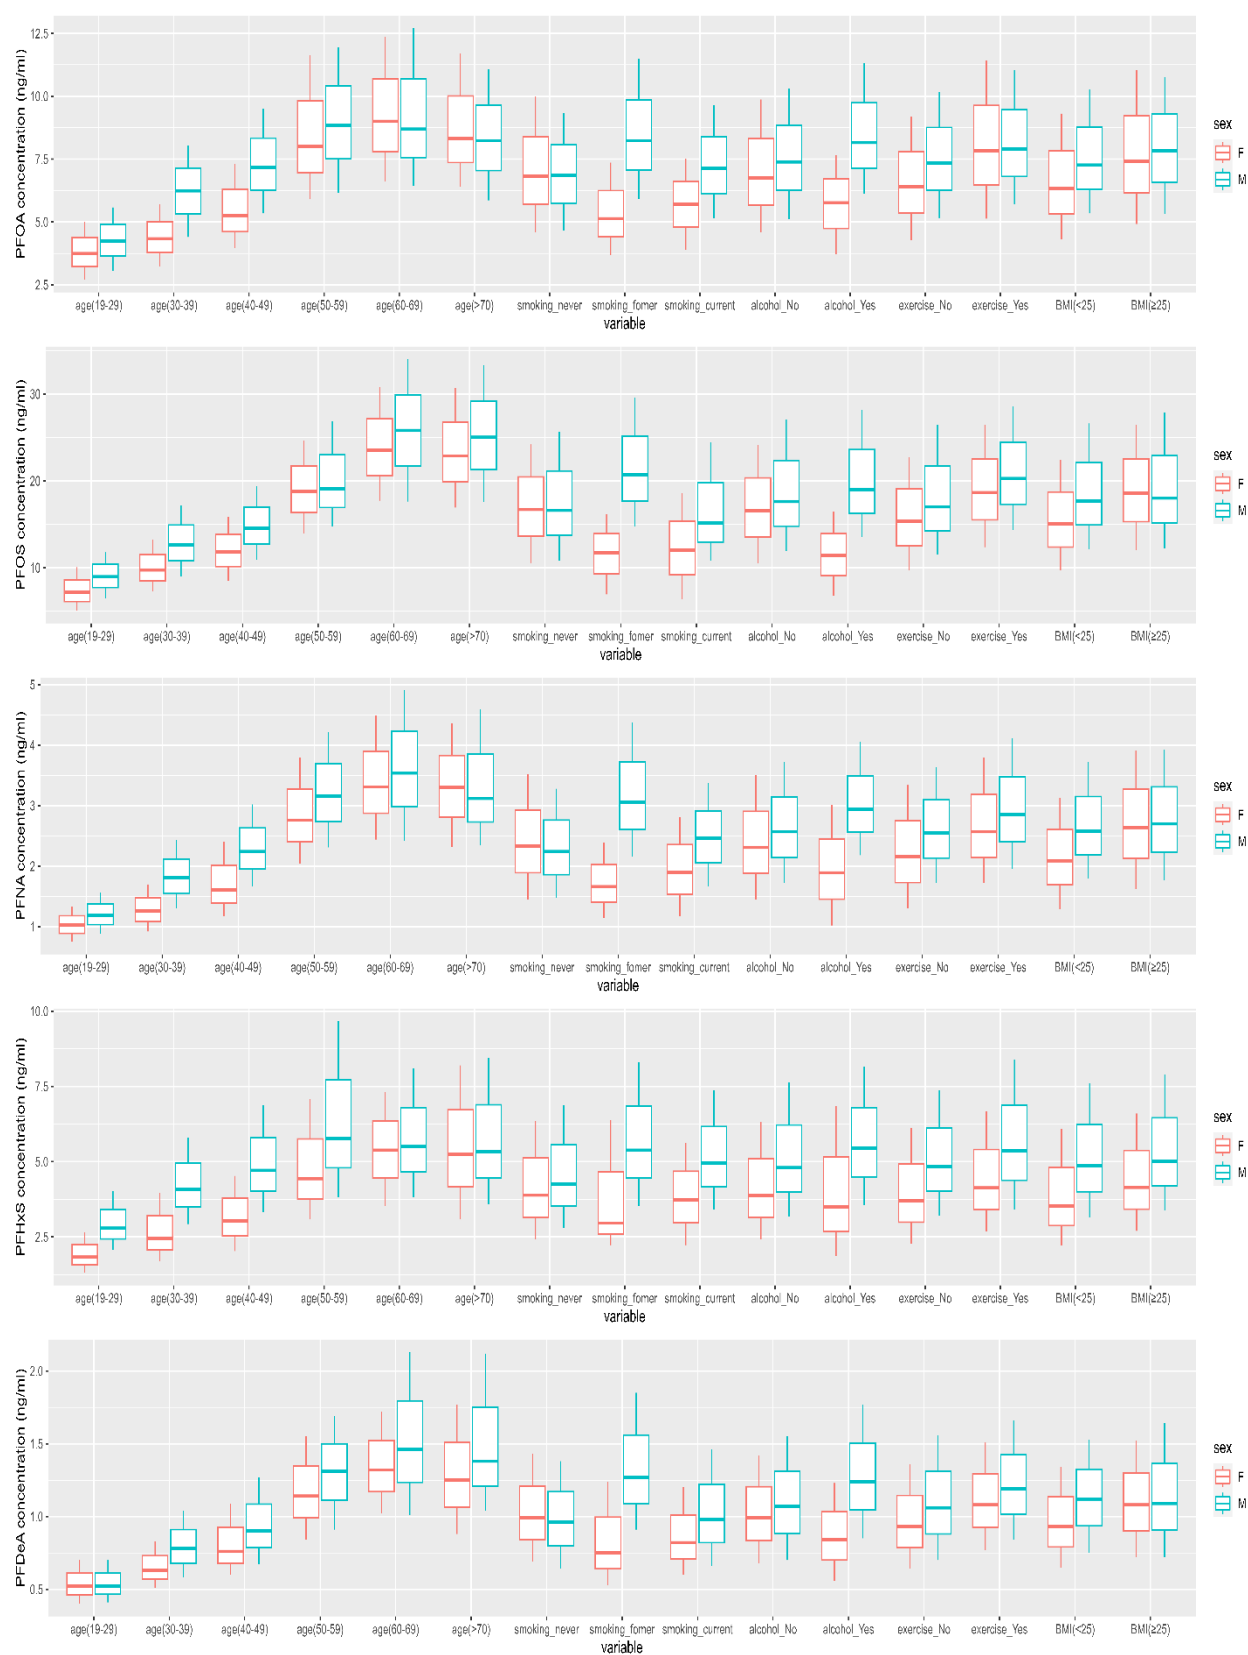

**Figure S1** Distribution of the median (IQR) values of serum PFAS concentration in the study population according to the variables.
